# Supplementary material
Source: MDPI journal article supplement (https://www.mdpi.com/2073-4395/12/3/672)
Supplement: s1 [file s1]

**Supplementary Table S1.** Significance (displayed as *p*-values) of nitrogen fertilizer rate treatments within each harvest time on “Meeker” floricane red raspberry average plant yield, berry weight, total soluble solids (TSS °Brix), fruit pH, titratable acidity (TA g L<sup>-1</sup>), and total soluble solids-to-titratable acidity ratio (TSS/TA) in 2020.

| Harvest time | Average plant yield | Berry weight | TSS  | pH   | TA   | TSS/TA |
|--------------|---------------------|--------------|------|------|------|--------|
| Early        | 0.95                | 0.99         | 0.29 | 0.75 | 0.06 | 0.33   |
| Middle       | 0.81                | 0.58         | 0.90 | 0.24 | 0.22 | 0.27   |
| Late         | 0.73                | 0.16         | 0.50 | 0.07 | 0.17 | 0.58   |
